**Title:** Application of an ecology-based analytic approach to discriminate signal and noise in low-biomass microbiome studies: whole lung tissue is the preferred sampling method for amplicon-based characterization of murine lung microbiota

**Authors:** Jennifer M. Baker<sup>1,2</sup>, Kevin J. Hinkle<sup>2</sup>, Roderick A. McDonald<sup>2</sup>, Nicole R. Falkowski<sup>2</sup>, Gary B. Huffnagle<sup>1,2,3,4</sup>, and Robert P. Dickson<sup>1,2,5\*</sup>

**Affiliations:**

1. Department of Microbiology and Immunology, University of Michigan Medical School, Ann Arbor, MI 48109, USA
2. Division of Pulmonary and Critical Care Medicine, Department of Internal Medicine, University of Michigan Medical School, Ann Arbor, MI 48109, USA
3. Department of Molecular, Cellular, & Developmental Biology, University of Michigan, Ann Arbor, MI 48109, USA
4. Mary H. Weiser Food Allergy Center, University of Michigan Medical School, Ann Arbor, MI 48109, USA
5. Michigan Center for Integrative Research in Critical Care; Ann Arbor, Michigan

**Corresponding Author Information:**

Robert P. Dickson, MD  
Pulmonary & Critical Care Medicine  
University of Michigan Health System  
6220 MSRB III / SPC 5642  
1150 W. Medical Center Dr.  
Ann Arbor, MI 48109-5642  
rodickso@med.umich.edu  
(734) 277-1487 (mobile)  
(734) 764-2655 (fax)  
(734) 936-9368 (lab)  
(734) 936-5010 (administrator)

1 **Abstract**

2 **Background:** Low-biomass microbiome studies (such as those of the lungs, placenta, and skin)  
3 are vulnerable to contamination and sequencing stochasticity, which obscure legitimate  
4 microbial signal. Since low-biomass microbiome fields have had variable success in establishing  
5 the reality and clinical significance of identified microbiota, we sought to develop and apply an  
6 analytical approach to discriminate signal from noise in low-biomass microbiome studies. We  
7 used this approach to determine the optimal sampling strategy in murine lung microbiome  
8 studies, which will be essential for future mechanistic lung microbiome research.

9  
10 **Methods:** Using a novel, ecology-based analytic approach, we compared bacterial DNA from  
11 the lungs of healthy adult mice collected via two common sampling approaches: homogenized  
12 whole lung tissue and bronchoalveolar lavage (BAL) fluid. We quantified bacterial DNA using  
13 droplet digital PCR, characterized bacterial communities using 16S rRNA gene sequencing, and  
14 systematically assessed the quantity and identity of bacterial DNA in both specimen types. We  
15 compared bacteria detected in lung specimens to each other and to potential source  
16 communities: negative (background) control specimens and paired oral samples.

17  
18 **Findings:** By all measures, whole lung tissue in mice contained greater bacterial signal and less  
19 evidence of contamination than did BAL fluid. Relative to BAL fluid, whole lung tissue exhibited  
20 a greater quantity of bacterial DNA, distinct community composition, decreased sample-to-  
21 sample variation, and greater biological plausibility when compared to potential source  
22 communities. In contrast, bacteria detected in BAL fluid were minimally different from those of  
23 procedural, reagent, and sequencing controls.

24  
25 **Interpretation:** An ecology-based analytical approach discriminates signal from noise in low-  
26 biomass microbiome studies and identifies whole lung tissue as the preferred specimen type for

27 murine lung microbiome studies. Sequencing, analysis, and reporting of potential source  
28 communities, including negative control specimens and contiguous biological sites, is crucial for  
29 biological interpretation of low-biomass microbiome studies, independent of specimen type.

30

31 **Funding:** National Institutes of Health

## 32 **Introduction**

33 Though the development of next-generation sequencing has led to heightened interest in the  
34 study of microbial communities across biological contexts, the study of low-biomass  
35 microbiomes is particularly challenging and requires the development of new methodological  
36 approaches. Low-biomass samples - samples with low densities of bacterial cells and therefore  
37 low quantities of bacterial DNA - are susceptible to contamination with background-derived  
38 signal, which affects the taxonomic composition of low-biomass samples<sup>1,2</sup> and makes it  
39 challenging to decipher biological meaning from sequencing data<sup>3</sup>. These methodological  
40 challenges exist in all fields that study low-biomass microbial communities across  
41 environmental, industrial, and biomedical contexts.

42

43 Low-biomass microbiome fields have had variable success in overcoming these methodological  
44 challenges. Whereas early findings related to the purported placenta microbiome have  
45 subsequently been attributed to contamination<sup>4,5</sup>, the lung microbiome field has flourished with  
46 robust, validated findings: lung microbiota are detectable in health<sup>6-12</sup>, correlated with lung  
47 immunity both in health<sup>7,8</sup> and disease<sup>13-15</sup>, correlated with disease severity and predictive of  
48 response to therapy<sup>16-19</sup>, and prognostic of clinical outcome in multiple conditions<sup>20-27</sup>. The lung  
49 microbiome field addressed the challenge of low-biomass microbiome sampling by  
50 systematically defining methods that collect representative populations of lung microbiota to  
51 maximize bacterial DNA content and minimize vulnerability to background contamination<sup>9-12</sup>. As  
52 a result, empirically validated sampling approaches such as bronchoalveolar lavage (BAL) fluid,  
53 which samples a large surface area and yields high sample volumes, and sputum, which  
54 contains concentrated densities of bacterial cells, have been successfully implemented in  
55 human lung microbiome studies<sup>28</sup>.

56

57 Yet despite their routine use in human lung microbiome studies, these sampling methods are  
58 not easily adapted for sampling lung microbiota in murine models, which will be critical to  
59 understand the mechanisms that govern the relationship between respiratory tract microbiota  
60 and pulmonary disease. Anatomic considerations make the application of sequencing-based  
61 techniques to murine lung microbiome studies particularly challenging. Collection of BAL fluid is  
62 severely limited by the small (~1 mL) volume of the murine lung<sup>29</sup>, and sputum collection is not  
63 possible in mice. In contrast, analysis of homogenized lung tissue is more feasible in mice than  
64 humans, and represents a viable option for maximizing the bacterial DNA content in murine lung  
65 samples<sup>30</sup>. The ability to effectively sample low-biomass microbial communities is inherently  
66 context-dependent and will require new solutions adapted to the particular context of each  
67 study.

68

69 We therefore designed an empirical approach to compare microbial signal detected in two  
70 distinct sample types collected from the same ecological site (murine lungs) with the following  
71 goals: 1) to assess the usefulness of microbial ecology-based analytical techniques repurposed  
72 for the discrimination of legitimate microbial signal from background noise and 2) to determine  
73 the sampling method that is best suited for the characterization of the murine lung microbiome.  
74 To accomplish these goals, we quantified and sequenced the bacterial DNA present in BAL fluid  
75 and whole lung tissue from otherwise genetically- and environmentally-identical healthy mice  
76 and compared them using a novel analytic approach (Figure 1).

77 **Methods**

78 **Ethics approval:** The animal studies described in this manuscript were approved by the  
79 Institutional Animal Care and Use Committee at the University of Michigan. Laboratory animal  
80 care policies at the University of Michigan follow the Public Health Service Policy on Humane  
81 Care and Use of Laboratory Animals.

82

83 **Mice:** Eight-week-old female C57BL/6 mice (n = 20) were purchased from Jackson Laboratories  
84 and housed under specific pathogen-free conditions. Mice were housed in five-animal cages in  
85 a common animal housing room and did not receive independent ventilation. Mice were allowed  
86 to acclimate for 1 week before harvest at 9 weeks of age. To avoid batch effect, mice were  
87 randomly assigned to specimen type (BAL fluid or whole lung tissue) and evenly sampled  
88 across cages. Animal experimentation was performed in compliance with the ARRIVE  
89 Guidelines<sup>31,32</sup>. Details regarding tissue collection and processing are reported in the online  
90 supplement (Figure 1, step 1).

91

92 **DNA extraction, quantification, and 16S rRNA gene sequencing:** DNA was extracted,  
93 amplified, and sequenced according to previously published protocols<sup>33,34</sup> (Figure 1, steps 2,4).  
94 Sequencing was performed with the MiSeq platform (Illumina). Bacterial DNA in lung specimens  
95 and negative controls was quantified with a QX200 ddPCR system (Bio-Rad, Hercules, CA)  
96 according to a previously published protocol<sup>35</sup>. Details are provided in the online supplement.

97

98 **Data analysis:** 16S rRNA gene sequencing data were processed using mothur (v. 1.43.0)  
99 according to the Standard Operating Procedure for MiSeq sequence data using a minimum  
100 sequence length of 250 base pairs<sup>36,37</sup>. Overall significance was determined as appropriate by  
101 the Kruskal-Wallis test and by permutational multivariate ANOVA (PERMANOVA) with 10,000  
102 permutations using Euclidean distances (adonis). Pairwise significance was determined as

103 appropriate by the Wilcoxon test with the Benjamini-Hochberg correction for multiple  
104 comparisons, Tukey's HSD test, and two-sample independent Mann-Whitney U test. All  
105 statistical tests used  $p=0.05$  as a threshold for significance. Details regarding statistical and  
106 ecologic analysis are reported in the online supplement.

107 **Results**

108 *Murine whole lung tissue contains more bacterial DNA than BAL fluid and negative controls*

109 Obtaining quality sequencing data depends on the presence of sufficient bacterial DNA in the  
110 samples to be analyzed. Therefore, we first compared the quantity of bacterial DNA in whole  
111 lung tissue and BAL fluid obtained from healthy C57BL/6 mice (Figure 1, step 3). We

112 hypothesized that whole lung tissue contains more bacterial DNA compared to BAL fluid. To test  
113 this hypothesis, we determined the number of 16S rRNA gene copies present in DNA isolated  
114 from whole lung tissue, BAL fluid, and negative control specimens using droplet digital PCR  
115 (ddPCR). As seen in Figure 2, BAL fluid and whole lung tissue both contained a significantly  
116 greater quantity of bacterial DNA than the isolation control ( $p=0.0084$  and  $0.0026$ , respectively).

117 In contrast, BAL fluid did not contain more bacterial DNA than sampling controls or no template  
118 controls ( $p>0.05$ ). Whole lung tissue contained significantly more bacterial DNA than all other  
119 groups, including all negative controls ( $p=0.0001$ ). Whole lung tissue contained 27-fold more  
120 16S rRNA gene copies than BAL fluid (64,110 vs. 2,367 mean copies/mL, respectively;  
121  $p=0.0002$ ). We thus concluded that murine whole lung tissue contains a greater quantity of  
122 bacterial DNA than does BAL fluid.

123

124 Having confirmed the presence of detectable bacterial DNA in whole lung tissue and BAL fluid,  
125 we proceeded with 16S rRNA gene sequencing according to a standard low-biomass protocol.

126 Along with whole lung tissue and BAL fluid, we sequenced a variety of controls, including cecum  
127 as a high-biomass positive control, tongue as a low-biomass positive control and potential  
128 source community of the lower respiratory tract, a synthetic mock community as a positive  
129 sequencing control, and negative controls for each stage of specimen processing, including  
130 sampling, DNA isolation, and sequencing controls. Details regarding adequacy of sequencing  
131 are provided in the online supplement.

132



133 *Murine whole lung tissue has increased alpha diversity and decreased sample-to-sample*  
134 *variation relative to BAL fluid and negative controls*

135 We next determined if the alpha (within-sample) diversity also differed across sampling  
136 approaches (Figure 1, step 5). We hypothesized that the increased quantity of bacterial DNA in  
137 whole lung tissue would yield greater diversity of bacterial taxa in whole lung tissue compared to  
138 BAL fluid. To test this hypothesis, we calculated community richness as measured by the  
139 number of unique operational taxonomic units (OTUs) present in each specimen and negative  
140 control. As predicted, whole lung tissue had greater community richness than BAL fluid  
141 ( $p=0.001$ ) and sampling, isolation, and sequencing controls ( $p<0.001$  for all comparisons)  
142 (Figure 3). In contrast, whole lung and BAL specimens did not significantly differ in Shannon  
143 diversity index, which reflects both community richness and evenness ( $p>0.05$ ; Supplementary  
144 Figure 2). We therefore concluded that alpha diversity differs across sampling approaches, with  
145 greater alpha diversity in whole lung tissue driven by the detection of greater numbers of unique  
146 OTUs relative to BAL fluid.

147  
148 Since BAL fluid contained low quantities of bacterial DNA and fewer unique OTUs than whole  
149 lung tissue, we suspected that incomplete sampling of the respiratory tract via saline lavage  
150 may also result in increased sampling and sequencing stochasticity<sup>38</sup>, which both lead to  
151 decreased specimen-to-specimen reproducibility of cohoused mice (which have similar lung  
152 microbiota<sup>6</sup>). We thus hypothesized that whole lung tissue would have decreased sample-to-  
153 sample variation relative to BAL fluid, representing greater replicability. To test this hypothesis,  
154 we computed the Bray-Curtis dissimilarity index, a beta-diversity metric based on pairwise inter-  
155 sample distances between specimens of the same type (i.e. we compared each whole lung  
156 tissue specimen to each other whole lung tissue specimen, and likewise for BAL fluid). Whole  
157 lung tissue yielded a decrease in average Bray-Curtis dissimilarity index relative to that of BAL  
158 fluid and empty well controls ( $p<0.0001$ ) (Figure 4). In contrast, the average Bray-Curtis

159 dissimilarity index for BAL fluid was not significantly different than the highly dissimilar empty  
160 well controls ( $p=0.27$ ). These results indicate that whole lung tissue displays decreased sample-  
161 to-sample variation and samples the lung microbiome of mice more reproducibly than BAL fluid.

162

163 *The taxonomic composition of murine whole lung tissue is similar to its oral microbiome source*  
164 *community and is distinct from negative controls, whereas that of BAL fluid is not distinct from*  
165 *negative controls*

166 Having identified differences in bacterial quantity and diversity across sampling approaches, we  
167 next assessed whether the taxonomic composition of whole lung tissue and BAL fluid differed  
168 from each other and from negative controls (Figure 1, step 6). Since whole lung tissue had  
169 higher bacterial DNA content and alpha diversity than BAL fluid, we hypothesized that the  
170 taxonomic composition of BAL fluid would more closely resemble that of negative control  
171 specimens than would whole lung tissue, reflecting background contamination and sequencing  
172 noise as predominant sources of taxa in BAL fluid. To test this hypothesis, we used principal  
173 component analysis (PCA) to compare the similarity of taxa identified in whole lung tissue, BAL  
174 fluid, and negative control specimens. As seen in Figure 5A, the taxonomic composition of  
175 whole lung tissue was distinct from that of BAL fluid ( $p=0.00009$ ) and pooled sampling controls  
176 ( $p=0.0004$ ). In contrast, BAL fluid showed prominent overlap with sampling controls and did not  
177 differ in overall community composition ( $p=0.46$ ). Similar results were obtained when comparing  
178 whole lung tissue and BAL fluid with isolation and sequencing controls (Supplementary Figure  
179 3A,B). Overall, these data show that the taxonomic composition of whole lung tissue is distinct  
180 from that of BAL fluid and negative controls, whereas BAL fluid is not distinct from most  
181 negative controls.

182

183 We next assessed the biological plausibility of bacterial taxa by comparing whole lung tissue  
184 and BAL fluid communities to their likely source community, the oral microbiome (Figure 1, step

185 7). We hypothesized that the taxonomic composition of whole lung tissue would more closely  
186 resemble that of the oral microbiome source community than does BAL fluid. Principal  
187 component analysis confirmed that tongue and whole lung tissue display similar but statistically  
188 different ( $p=0.01$ ) taxonomic compositions, whereas BAL fluid clusters separately both from  
189 tongue ( $p=0.00009$ ) and whole lung tissue (Figure 5B). The clustering of BAL fluid with negative  
190 controls and tongue with whole lung tissue is also observed when plotting all lung, tongue, and  
191 negative control samples together (Supplementary Figure 3C). We confirmed these results by  
192 calculating the Bray-Curtis dissimilarity index for matched (i.e. from the same mouse) tongue  
193 and lung samples (Figure 5C). Consistent with the PCA results, whole lung tissue more closely  
194 resembled the oral source community than did BAL fluid ( $p=0.0004$ ). Rank abundance analysis  
195 revealed that the prominent taxa in whole lung tissue were also common in tongue specimens,  
196 whereas taxa in BAL fluid bore little resemblance to oral taxa and instead resembled taxa in  
197 negative controls (Figure 5D). The similarity of taxa in the whole lung and tongue samples and  
198 the BAL fluid and negative control samples, respectively, can also be observed when ordering  
199 rank abundance plots by the taxa found in the tongue or pooled negative controls  
200 (Supplementary Figure 4). Together, these results confirm that the bacterial taxa identified in  
201 whole lung tissue are more biologically plausible than those detected in BAL fluid.

202 **Discussion**

203 This study illustrates how an ecology-based analytical approach can determine the reality of  
204 bacterial signal in low-biomass microbiome studies. Our approach revealed the superiority of  
205 murine whole lung tissue relative to BAL fluid in detecting bacterial signal, and validates the use  
206 of whole lung tissue for lung microbiome studies in mice. The bacterial signal in murine whole  
207 lung tissue is stronger than that of BAL fluid by all comparisons: increased quantity of bacterial  
208 DNA, greater diversity of bacterial taxa, and taxonomic composition that is reproducible across  
209 biological replicates, distinct from negative controls, and more similar to the oral microbiome, a  
210 biologically plausible source community (Table 1).

211  
212 This study represents the first systematic comparison of sampling methods appropriate for the  
213 study of the murine lung microbiome. The lack of empirically-validated methods for sampling  
214 lung microbiota in mice is particularly concerning in light of the current reproducibility crisis<sup>39</sup> and  
215 recent controversial low-biomass studies<sup>4,5,40</sup>, which highlight the dangers of over-interpreting  
216 noisy sequencing data in the absence of rigorous, field-specific standards. A systematic  
217 examination of methods for sampling lung microbiota in mice is overdue, especially considering  
218 the first report describing the murine lung microbiome was published almost a decade ago<sup>41</sup>.  
219 Published murine lung microbiome studies to date have used both whole lung tissue<sup>6,42-47</sup> as  
220 well as BAL fluid<sup>48-50</sup>, but no study to date has directly compared sample approaches. Based on  
221 the findings of the current study, we strongly recommend whole lung tissue as a preferred  
222 sampling strategy for subsequent murine lung microbiome studies.

223  
224 While BAL fluid in mice contains weak bacterial signal relative to lung tissue, in humans the  
225 opposite has been observed: human BAL specimens contain consistently stronger bacterial  
226 signal than lung tissue acquired via biopsy. This observation is consistent with anatomic and  
227 ecologic differences across species. Anatomically, human lungs are much larger than murine

228 lungs, providing increased surface area for sampling (~75 m<sup>2</sup> vs. 0.008 m<sup>2</sup>) and more airspace  
229 (6 L vs. 0.001 L) to accommodate the collection of far larger volumes of BAL fluid<sup>29,30,51</sup>. Biopsy  
230 specimens of human lungs are typically small in volume and peripheral in anatomic location,  
231 meaning they are predominantly composed of interstitium rather than airways and alveolar  
232 space (where bacteria are more likely to be found). In contrast, use of whole lung homogenate  
233 in mice ensures capture of all bacterial DNA within the entire respiratory tract. Thus, anatomic  
234 and ecologic differences between humans and mice necessitates the use of murine-specific  
235 sampling approaches, and illustrates why a “one-size-fits-all” approach to low-biomass  
236 microbiome sampling is unlikely to work: sampling strategies will need to be tailored to their  
237 specific environmental and biologic contexts.

238

239 Numerous sources of false signal can confound detection of bacterial communities in low-  
240 biomass microbiome studies, including contamination (procedural, reagent, and sequencing)  
241 and sequencing stochasticity. Salter and colleagues elegantly demonstrated the susceptibility of  
242 low-biomass samples to reagent contamination by sequencing serial dilutions of a pure bacterial  
243 culture, where increasingly diluted specimens contained increasing abundances of taxa found in  
244 the DNA isolation reagents<sup>1</sup>. Other sources of contamination, such as those introduced during  
245 specimen collection (e.g. bronchoscope, surgical instruments, collection tubes) or sequencing  
246 (e.g. well-to-well contamination or index switching) may also alter the taxonomic composition of  
247 low-biomass samples<sup>52,53</sup>. Additionally, it has recently been demonstrated via the use of  
248 sequencing replicates that sequencing stochasticity is itself a major source of variability in  
249 microbial signal in low-biomass studies<sup>38</sup>. Given the numerous sources of potential false signal  
250 in low-biomass microbiome studies, we do not believe this methodological challenge can be  
251 sufficiently addressed with a simple, universal solution (e.g. a single bioinformatic  
252 “decontamination” step). Rather, as illustrated in our approach, we believe the reality of

253 microbiologic signal must be assessed within the specific ecologic context from which it is  
254 sampled, and anchored in an understanding of microbial ecology.

255

256 Several alternate approaches to false signal in low-biomass microbiome studies have been  
257 proposed. Strategies used to detect, interpret, and in some cases, eliminate, contamination  
258 have included exclusion of taxa detected in negative controls through statistical packages<sup>54,55</sup> or  
259 unbiased subtraction<sup>7</sup>, extraction and sequencing technical replicates<sup>38</sup>, calculation of  
260 abundance ratios<sup>56</sup>, correlation analyses<sup>57</sup>, hierarchical clustering<sup>58</sup>, and building neutral  
261 models<sup>59</sup>. In contrast, we propose a simple analytical approach grounded in principles of  
262 microbial ecology to discriminate true microbial signal from background-derived signal. While  
263 this approach requires the use of several complementary metrics to determine the extent of  
264 background-derived signal in each specimen type, it is relatively accessible for those conducting  
265 microbiome studies due to its dependence on open-source software, conceptual familiarity to  
266 microbial ecologists, and ease of application to other low-biomass sites. Fundamentally, this  
267 approach relies on sampling the low-biomass body site of interest and comparing the size,  
268 diversity, and taxonomic composition of the microbial community identified at that low-biomass  
269 site to all potential source communities, including background signal derived from procedural,  
270 reagent, and sequencing contamination and true microbial signal derived from contiguous body  
271 sites. This approach can thus be applied to a single specimen type to discern true bacterial  
272 signal from background-derived noise, or used to compare multiple specimen types to  
273 determine the optimal sampling method in the absence of a gold standard. Our approach does  
274 not preclude the use of complementary methods (such as those mentioned above), but rather  
275 builds a foundation rooted in thorough experimental design and microbial ecology to support  
276 further analyses.

277

278 There are several limitations to our study. We selected methods of harvesting BAL fluid and  
279 whole lung tissue which have been used by our lab and others successfully, and thus cannot  
280 directly speak to other approaches (e.g. use of lung portions or pooled BAL specimens from  
281 multiple mice). Our study only tested the use of whole lung tissue and BAL fluid for the purposes  
282 of amplicon-based sequencing, and may yield different results if other sequencing methods (e.g.  
283 metagenomic sequencing) are applied. Whole lung tissue contains much more host DNA than  
284 bacterial DNA, which can confound attempts at metagenomic analyses due to the depth of  
285 sequencing required to return reliable bacterial data<sup>60</sup>. Given the impossibility of performing both  
286 BAL and whole lung homogenization on the same mouse, we could not perform paired analysis  
287 on the same mice. We assumed, based on prior results<sup>6</sup>, that co-housed mice from the same  
288 vendor and shipment should have lung bacterial communities with similar taxonomic  
289 composition. Yet it remains possible that mouse-to-mouse variation may have confounded  
290 some comparisons. Finally, despite our efforts to thoroughly account for all possible sources of  
291 bacterial signal found in both types of lung specimens, it is possible that we have not accounted  
292 for all potential source communities, including occult sources of contamination or other body  
293 sites in contact with the lungs, such as the nasopharynx and blood.

294

295 In conclusion, we here present an ecology-based analytical approach for distinguishing true  
296 bacterial signal from background contamination in low biomass microbiome studies and provide  
297 evidence supporting the use of whole lung tissue over BAL fluid in murine lung microbiome  
298 studies. The use of our ecology-based analytic approach highlights the importance of  
299 sequencing, analyzing, and reporting ample negative controls and, to the extent possible,  
300 contiguous anatomical sites or other biological source communities to assess the reality of  
301 bacterial signal in low-biomass microbiome studies.

302

303 **Abbreviations**

304 BAL: bronchoalveolar lavage; DNA: deoxyribonucleic acid; OTU: operational taxonomic unit;  
305 PCA: principal component analysis; PCR: polymerase chain reaction; rpm: revolutions per  
306 minute; PBS: phosphate-buffered saline; ddPCR: droplet digital PCR

307

308 **Contributors**

309 JMB participated in study design, sample collection, data acquisition, bioinformatic and  
310 statistical analysis, data interpretation, and drafted and revised the manuscript. KJH, RAM, and  
311 NRF participated in sample collection and processing and data acquisition. GBH participated in  
312 study design, data interpretation, and manuscript revision. RPD conceived the study design and  
313 participated in data interpretation and manuscript revision. All authors read and approved this  
314 version of the manuscript.

315

316 **Declaration of interests**

317 We declare no competing interests.

318

319 **Data sharing**

320 The dataset supporting the results of this article has been posted to the NIH Sequence Read  
321 Archive (accession number: PRJNA644805). The script used for mothur analysis can be found  
322 at <https://github.com/piyuranjan/DicksonLabScripts/blob/master/mothurGreatLakes.sh>. R code  
323 and accompanying files for the microbial community analysis and statistical tests presented in  
324 this paper can be found at <https://github.com/dicksonlunglab/WholeLungvBALFluid>.

325

326 **Funding**

327 Funding provided by NIH R01 Projects 1R01HL144599 (RPD), 1R01HL121774 (GBH), and  
328 1R01AI138348 (GBH).



329

330 **Acknowledgements**

331 This research was supported in part by the University of Michigan Medical School Host

332 Microbiome Initiative and by work performed by The University of Michigan Microbiome Core.

333 Figures were created in part using BioRender.com. The authors thank Piyush Ranjan,

334 Christopher Brown, Rishi Chanderraj, and John Erb-Downward for assistance with bioinformatic

335 and statistical analyses and William R. Branton for his assistance in generation of pilot data.

336

337 **References**

- 338
- 339 1. Salter SJ, Cox MJ, Turek EM, et al. Reagent and laboratory contamination can critically  
340 impact sequence-based microbiome analyses. *BMC Biol* 2014; **12(1)**: 87. doi:  
341 10.1186/s12915-014-0087-z.
- 342 2. Biesbroek G, Sanders EAM, Roeselers G, et al. Deep sequencing analyses of low density  
343 microbial communities: working at the boundary of accurate microbiota detection. Gilbert  
344 JA, ed. *PLoS ONE* 2012; **7(3)**: e32942. doi: 10.1371/journal.pone.0032942.
- 345 3. The Lancet Infectious Diseases. Microbiome studies and “blue whales in the Himalayas.”  
346 *Lancet Infect Dis* 2018; **18(9)**: 925. doi: 10.1016/S1473-3099(18)30503-6.
- 347 4. Lauder AP, Roche AM, Sherrill-Mix S, et al. Comparison of placenta samples with  
348 contamination controls does not provide evidence for a distinct placenta microbiota.  
349 *Microbiome* 2016; **4(1)**: 29. doi: 10.1186/s40168-016-0172-3.
- 350 5. Leiby JS, McCormick K, Sherrill-Mix S, et al. Lack of detection of a human placenta  
351 microbiome in samples from preterm and term deliveries. *Microbiome* 2018; **6(1)**: 196. doi:  
352 10.1186/s40168-018-0575-4.
- 353 6. Dickson RP, Erb-Downward JR, Falkowski NR, Hunter EM, Ashley SL, Huffnagle GB. The  
354 lung microbiota of healthy mice are highly variable, cluster by environment, and reflect  
355 variation in baseline lung innate immunity. *Am J Respir Crit Care Med* 2018; **198(4)**: 497-  
356 508. doi: 10.1164/rccm.201711-2180OC.
- 357 7. Segal LN, Alekseyenko AV, Clemente JC, et al. Enrichment of lung microbiome with  
358 supraglottic taxa is associated with increased pulmonary inflammation. *Microbiome* 2013;  
359 **1(1)**: 19. doi: 10.1186/2049-2618-1-19.
- 360 8. Segal LN, Clemente JC, Tsay J-CJ, et al. Enrichment of the lung microbiome with oral taxa  
361 is associated with lung inflammation of a Th17 phenotype. *Nat Microbiol* 2016; **1(5)**:  
362 16031. doi: 10.1038/nmicrobiol.2016.31.
- 363 9. Charlson ES, Bittinger K, Haas AR, et al. Topographical continuity of bacterial populations  
364 in the healthy human respiratory tract. *Am J Respir Crit Care Med* 2011; **184(8)**: 957-963.  
365 doi: 10.1164/rccm.201104-0655OC.
- 366 10. Charlson ES, Bittinger K, Chen J, et al. Assessing bacterial populations in the lung by  
367 replicate analysis of samples from the upper and lower respiratory tracts. *PLoS ONE* 2012;  
368 **7(9)**: e42786. doi: 10.1371/journal.pone.0042786.
- 369 11. Dickson RP, Erb-Downward JR, Freeman CM, et al. Spatial variation in the healthy human  
370 lung microbiome and the adapted island model of lung biogeography. *Ann Am Thorac Soc*  
371 2015; **12(6)**: 821-830. doi: 10.1513/AnnalsATS.201501-029OC.
- 372 12. Dickson RP, Erb-Downward JR, Freeman CM, et al. Bacterial topography of the healthy  
373 human lower respiratory tract. *mBio* 2017; **8(1)**: e02287-16. doi: 10.1128/mBio.02287-16.  
374

- 375 13. Dickson RP, Erb-Downward JR, Prescott HC, et al. Intraalveolar catecholamines and the  
376 human lung microbiome. *Am J Respir Crit Care Med* 2015; **192(2)**: 257-259. doi:  
377 10.1164/rccm.201502-0326LE.
- 378 14. Wang J, Lesko M, Badri MH, et al. Lung microbiome and host immune tone in subjects  
379 with idiopathic pulmonary fibrosis treated with inhaled interferon- $\gamma$ . *ERJ Open Res* 2017;  
380 **3(3)**: 00008-02017. doi: 10.1183/23120541.00008-2017.
- 381 15. O'Dwyer DN, Ashley SL, Gurczynski SJ, et al. Lung microbiota contribute to pulmonary  
382 inflammation and disease progression in pulmonary fibrosis. *Am J Respir Crit Care Med*  
383 2019; **199(9)**: 1127-1138. doi: 10.1164/rccm.201809-1650OC.
- 384 16. Huang YJ, Nariya S, Harris JM, et al. The airway microbiome in patients with severe  
385 asthma: associations with disease features and severity. *J Allergy Clin Immunol* 2015;  
386 **136(4)**: 874-884. doi: 10.1016/j.jaci.2015.05.044
- 387 17. Zhang Q, Cox M, Liang Z, et al. Airway microbiota in severe asthma and relationship to  
388 asthma severity and phenotypes. Chalmers JD, ed. *PLoS ONE* 2016; **11(4)**: e0152724.  
389 doi: 10.1371/journal.pone.0152724.
- 390 18. Durack J, Lynch SV, Nariya S, et al. Features of the bronchial bacterial microbiome  
391 associated with atopy, asthma, and responsiveness to inhaled corticosteroid treatment. *J*  
392 *Allergy Clin Immunol* 2017; **140(1)**: 63-75. doi: 10.1016/j.jaci.2016.08.055.
- 393 19. Goleva E, Jackson LP, Harris JK, et al. The effects of airway microbiome on corticosteroid  
394 responsiveness in asthma. *Am J Respir Crit Care Med* 2013; **188(10)**: 1193-1201. doi:  
395 10.1164/rccm.201304-0775OC.
- 396 20. Leitao Filho FS, Alotaibi NM, Ngan D, et al. Sputum microbiome is associated with 1-year  
397 mortality after chronic obstructive pulmonary disease hospitalizations. *Am J Respir Crit*  
398 *Care Med* 2019; **199(10)**: 1205-1213. doi: 10.1164/rccm.201806-1135OC.
- 399 21. Molyneaux PL, Cox MJ, Willis-Owen SAG, et al. The role of bacteria in the pathogenesis  
400 and progression of idiopathic pulmonary fibrosis. *Am J Respir Crit Care Med* 2014; **190(8)**:  
401 906-913. doi: 10.1164/rccm.201403-0541OC.
- 402 22. Han MK, Zhou Y, Murray S, et al. Lung microbiome and disease progression in idiopathic  
403 pulmonary fibrosis: an analysis of the COMET study. *Lancet Respir Med* 2014; **2(7)**: 548-  
404 556. doi: 10.1016/S2213-2600(14)70069-4.
- 405 23. Invernizzi R, Barnett J, Rawal B, et al. Bacterial burden in the lower airways predicts  
406 disease progression in idiopathic pulmonary fibrosis and is independent of radiological  
407 disease extent. *Eur Respir J* 2020; **55(4)**: 1901519. doi: 10.1183/13993003.01519-2019.
- 408 24. Dickson RP, Schultz MJ, van der Poll T, et al. Lung microbiota predict clinical outcomes in  
409 critically ill patients. *Am J Respir Crit Care Med* 2020; **201(5)**: 555-563. doi:  
410 10.1164/rccm.201907-1487OC.
- 411 25. Panzer AR, Lynch SV, Langelier C, et al. Lung microbiota is related to smoking status and  
412 to development of acute respiratory distress syndrome in critically ill trauma patients. *Am J*  
413 *Respir Crit Care Med* 2018; **197(5)**: 621-631. doi: 10.1164/rccm.201702-0441OC.

- 414 26. Dickson RP, Erb-Downward JR, Freeman CM, et al. Changes in the Lung Microbiome  
415 following Lung Transplantation Include the Emergence of Two Distinct *Pseudomonas*  
416 Species with Distinct Clinical Associations. Davis IC, ed. *PLoS ONE* 2014; **9(5)**: e97214.  
417 doi: 10.1371/journal.pone.0097214.
- 418 27. Combs MP, Wheeler DS, Luth J, et al. Increasing relative abundance of pseudomonads  
419 predicts chronic rejection after lung transplant. *J Heart Lung Transplant* 2020; **39(4)**: S65.  
420 doi: 10.1016/j.healun.2020.01.1266.
- 421 28. Carney SM, Clemente JC, Cox MJ, et al. Methods in lung microbiome research. *Am J*  
422 *Respir Cell Mol Biol* 2020; **62(3)**: 283-299. doi: 10.1165/rcmb.2019-0273TR.
- 423 29. Schulte H, Mühlfeld C, Brandenberger C. Age-related structural and functional changes in  
424 the mouse lung. *Front Physiol* 2019; **10**: 1466. doi: 10.3389/fphys.2019.01466.
- 425 30. Dickson RP, Cox MJ. Sampling the lung microbiome. In: Cox MJ, Ege MJ, von Mutius E,  
426 eds. *The Lung Microbiome*. European Respiratory Society; 2019: 1-17. doi:  
427 10.1183/2312508X.10015418.
- 428 31. Kilkenny C, Browne WJ, Cuthill IC, Emerson M, Altman DG. Improving bioscience  
429 research reporting: the ARRIVE guidelines for reporting animal research. *PLoS Biol* 2010;  
430 **8(6)**: e1000412. doi: 10.1371/journal.pbio.1000412.
- 431 32. Percie du Sert N, Hurst V, Ahluwalia A, et al. Revision of the ARRIVE guidelines: rationale  
432 and scope. *BMJ Open Sci* 2018; **2(1)**: e000002. doi: 10.1136/bmjos-2018-000002.
- 433 33. Mason KL, Erb Downward JR, Mason KD, et al. *Candida albicans* and bacterial microbiota  
434 interactions in the cecum during recolonization following broad-spectrum antibiotic therapy.  
435 *Infect Immun* 2012; **80(10)**: 3371-3380. doi: 10.1128/IAI.00449-12.
- 436 34. Kozich JJ, Westcott SL, Baxter NT, Highlander SK, Schloss PD. Development of a dual-  
437 index sequencing strategy and curation pipeline for analyzing amplicon sequence data on  
438 the MiSeq Illumina sequencing platform. *Appl Environ Microbiol* 2013; **79(17)**: 5112-5120.  
439 doi:10.1128/AEM.01043-13.
- 440 35. Sze MA, Abbasi M, Hogg JC, Sin DD. A comparison between droplet digital and  
441 quantitative PCR in the analysis of bacterial 16S load in lung tissue samples from control  
442 and COPD GOLD 2. *PLoS ONE* 2014; **9(10)**: e110351. doi:  
443 10.1371/journal.pone.0110351.
- 444 36. Schloss PD. MiSeq SOP - mothur. 2019. [https://mothur.org/wiki/miseq\\_sop/](https://mothur.org/wiki/miseq_sop/) (accessed on  
445 March 26, 2020).
- 446 37. Schloss PD, Westcott SL, Ryabin T, et al. Introducing mothur: open-source, platform-  
447 independent, community-supported software for describing and comparing microbial  
448 communities. *Appl Environ Microbiol* 2009; **75(23)**: 7537-7541. doi: 10.1128/AEM.01541-  
449 09.
- 450 38. Erb-Downward JR, Falkowski NR, D'Souza JC, et al. Critical relevance of stochastic  
451 effects on low-bacterial-biomass 16S rRNA gene analysis. *mBio* 2020; **11(3)**: e00258-20.  
452 doi: 10.1128/mBio.00258-20.

- 453 39. Schloss PD. Identifying and overcoming threats to reproducibility, replicability, robustness,  
454 and generalizability in microbiome research. *mBio* 2018; **9(3)**: e00525-18. doi:  
455 10.1128/mBio.00525-18.
- 456 40. Aagaard K, Ma J, Antony KM, Ganu R, Petrosino J, Versalovic J. The placenta harbors a  
457 unique microbiome. *Sci Transl Med* 2014; **6(237)**: 237ra65. doi:  
458 10.1126/scitranslmed.3008599.
- 459 41. Barfod K, Roggenbuck M, Hansen L, et al. The murine lung microbiome in relation to the  
460 intestinal and vaginal bacterial communities. *BMC Microbiol* 2013; **13(1)**: 303. doi:  
461 10.1186/1471-2180-13-303.
- 462 42. Singh N, Vats A, Sharma A, Arora A, Kumar A. The development of lower respiratory tract  
463 microbiome in mice. *Microbiome* 2017; **5(1)**: 61. doi: 10.1186/s40168-017-0277-3.
- 464 43. Yun Y, Srinivas G, Kuenzel S, et al. Environmentally determined differences in the murine  
465 lung microbiota and their relation to alveolar architecture. *PLoS ONE* 2014; **9(12)**:  
466 e113466. doi: 10.1371/journal.pone.0113466.
- 467 44. Richmond BW, Brucker RM, Han W, et al. Airway bacteria drive a progressive COPD-like  
468 phenotype in mice with polymeric immunoglobulin receptor deficiency. *Nat Commun* 2016;  
469 **7(1)**: 11240. doi: 10.1038/ncomms11240.
- 470 45. Gollwitzer ES, Saglani S, Trompette A, et al. Lung microbiota promotes tolerance to  
471 allergens in neonates via PD-L1. *Nat Med* 2014; **20(6)**: 642-647. doi: 10.1038/nm.3568.
- 472 46. Dickson RP, Singer BH, Newstead MW, et al. Enrichment of the lung microbiome with gut  
473 bacteria in sepsis and the acute respiratory distress syndrome. *Nat Microbiol* 2016; **1(10)**:  
474 16113. doi: 10.1038/nmicrobiol.2016.113.
- 475 47. Ashley SL, Sjoding MW, Popova AP, et al. Lung and gut microbiota are altered by  
476 hyperoxia and contribute to oxygen-induced lung injury in mice. *Sci Transl Med* 2020;  
477 **12(556)**: eaau9959. doi: 10.1126/scitranslmed.aau9959.
- 478 48. Barfod KK, Vrankx K, Mirsepasi-Lauridsen HC, et al. The murine lung microbiome changes  
479 during lung inflammation and intranasal vancomycin treatment. *Open Microbiol J* 2015;  
480 **9(1)**: 167-179. doi: 10.2174/1874285801509010167.
- 481 49. Poroyko V, Meng F, Meliton A, et al. Alterations of lung microbiota in a mouse model of  
482 LPS-induced lung injury. *Am J Physiol-Lung Cell Mol Physiol* 2015; **309(1)**: L76-L83. doi:  
483 10.1152/ajplung.00061.2014.
- 484 50. Yadava K, Pattaroni C, Sichelstiel AK, et al. Microbiota promotes chronic pulmonary  
485 inflammation by enhancing IL-17A and autoantibodies. *Am J Respir Crit Care Med* 2016;  
486 **193(9)**: 975-987. doi: 10.1164/rccm.201504-0779OC.
- 487 51. Lutfi MF. The physiological basis and clinical significance of lung volume measurements.  
488 *Multidiscip Respir Med* 2017; **12(1)**: 3. doi: 10.1186/s40248-017-0084-5.

- 489 52. Minich JJ, Sanders JG, Amir A, Humphrey G, Gilbert JA, Knight R. Quantifying and  
490 understanding well-to-well contamination in microbiome research. *mSystems* 2019; **4(4)**:  
491 e00186-19. doi: 10.1128/mSystems.00186-19.
- 492 53. Sinha R, Stanley G, Gulati GS, et al. Index switching causes “spreading-of-signal” among  
493 multiplexed samples in Illumina HiSeq 4000 DNA sequencing. *BioRxiv* 2017; published  
494 online April 9. doi: 10.1101/125724.
- 495 54. Davis NM, Proctor DM, Holmes SP, Relman DA, Callahan BJ. Simple statistical  
496 identification and removal of contaminant sequences in marker-gene and metagenomics  
497 data. *Microbiome* 2018; **6(1)**: 226. doi: 10.1186/s40168-018-0605-2.
- 498 55. McKnight DT, Huerlimann R, Bower DS, Schwarzkopf L, Alford RA, Zenger KR.  
499 microDecon: a highly accurate read-subtraction tool for the post-sequencing removal of  
500 contamination in metabarcoding studies. *Environ DNA* 2019; **1(1)**: 14-25. doi:  
501 10.1002/edn3.11.
- 502 56. Robinson KM, Crabtree J, Mattick JSA, Anderson KE, Dunning Hotopp JC. Distinguishing  
503 potential bacteria-tumor associations from contamination in a secondary data analysis of  
504 public cancer genome sequence data. *Microbiome* 2017; **5(1)**: 9. doi: 10.1186/s40168-  
505 016-0224-8.
- 506 57. Weiss S, Van Treuren W, Lozupone C, et al. Correlation detection strategies in microbial  
507 data sets vary widely in sensitivity and precision. *ISME J* 2016; **10(7)**: 1669-1681. doi:  
508 10.1038/ismej.2015.235.
- 509 58. Bosch AATM, Levin E, van Houten MA, et al. Development of upper respiratory tract  
510 microbiota in infancy is affected by mode of delivery. *EBioMedicine* 2016; **9**: 336-345. doi:  
511 10.1016/j.ebiom.2016.05.031.
- 512 59. Venkataraman A, Bassis CM, Beck JM, et al. Application of a neutral community model to  
513 assess structuring of the human lung microbiome. *mBio* 2015; **6(1)**: e02284-14. doi:  
514 10.1128/mBio.02284-14.
- 515 60. Pereira-Marques J, Hout A, Ferreira RM, et al. Impact of host DNA and sequencing depth  
516 on the taxonomic resolution of whole metagenome sequencing for microbiome analysis.  
517 *Front Microbiol* 2019; **10**: 1277. doi: 10.3389/fmicb.2019.01277.



519 **Figures and Tables**

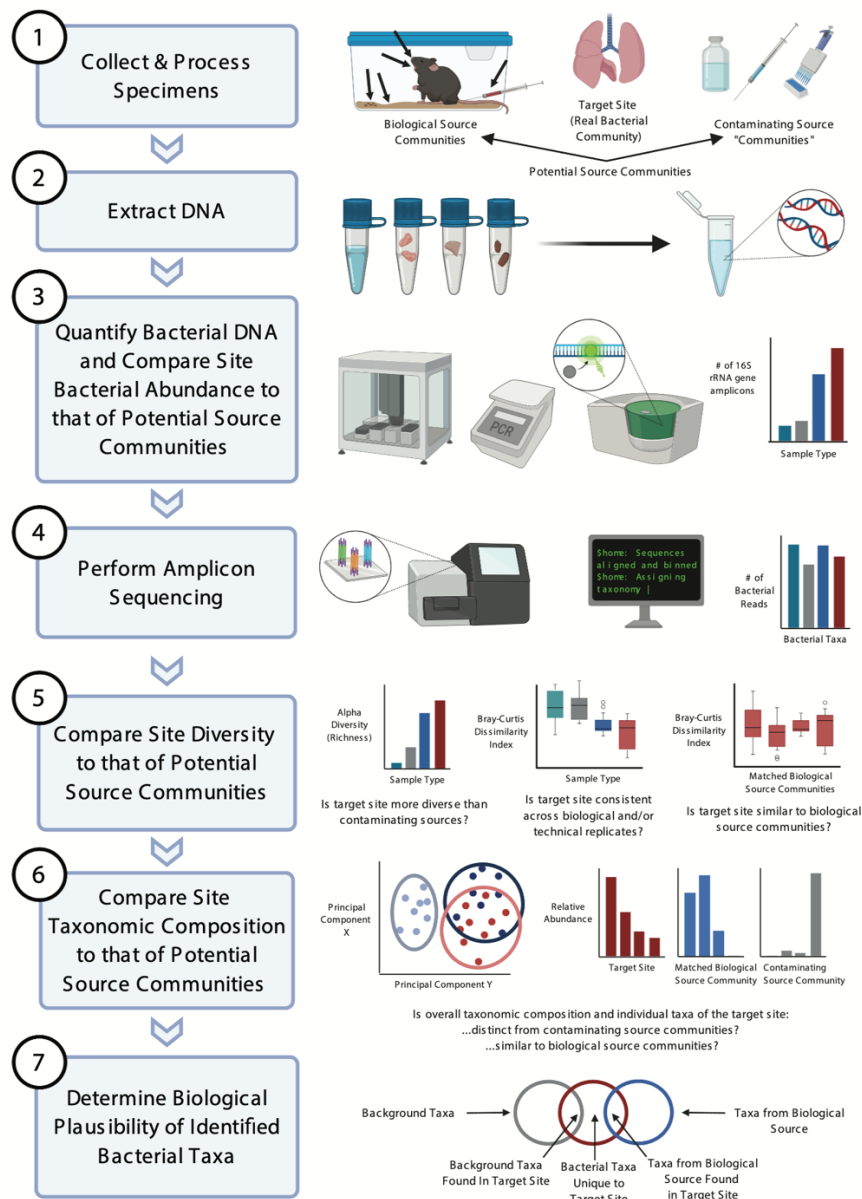

520

521 **Figure 1: A newly defined experimental and analytic approach can distinguish bacterial**

522 **signal from noise in low-biomass microbiome studies.** Graphical and conceptual outline of

523 an experimental and analytic approach to low-biomass microbiome studies. This approach was

524 applied to murine lung microbiome sampling optimization as a proof-of-concept in this study,

525 and may be useful in other low-biomass microbiome studies across biological contexts.

526

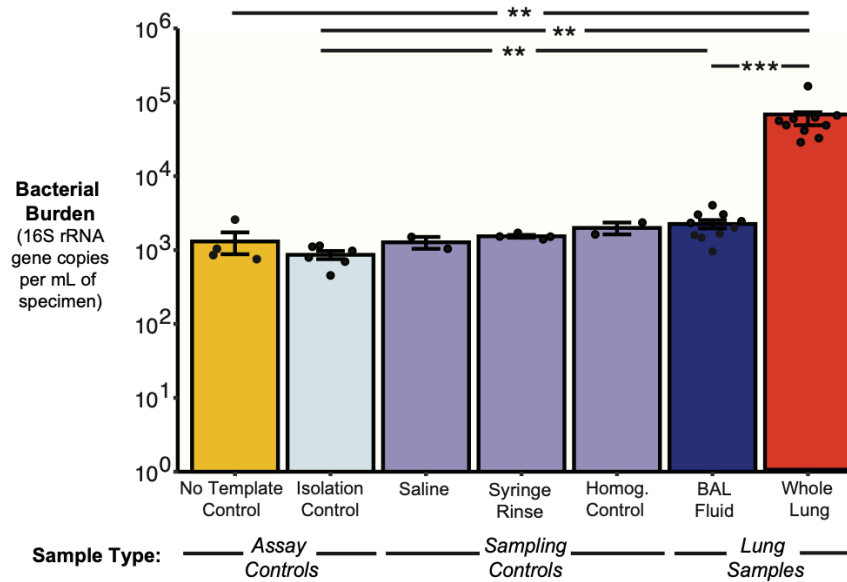

527

528 **Figure 2: Murine whole lung tissue contains increased bacterial burden relative to BAL**

529 **fluid and negative controls.** Whole lung tissue contains more copies of the bacterial 16S rRNA

530 gene per mL of DNA isolated from lung or control specimens as quantified by ddPCR. Mean  $\pm$

531 SEM and individual data points (representing the average of technical duplicates) are shown.

532 Overall significance was determined by the Kruskal-Wallis test ( $p = 0.0001$ ). Pairwise

533 significance was determined by the pairwise Wilcoxon test and corrected for multiple

534 comparisons using the Benjamini-Hochberg method (pairwise comparisons including whole lung

535 or BAL fluid that are not shown were not significant). Significance key: ns  $p > 0.05$ ; \*  $p \leq 0.05$ ; \*\*

536  $p \leq 0.01$ ; \*\*\*  $p \leq 0.001$ ; \*\*\*\* $p \leq 0.0001$ .

537



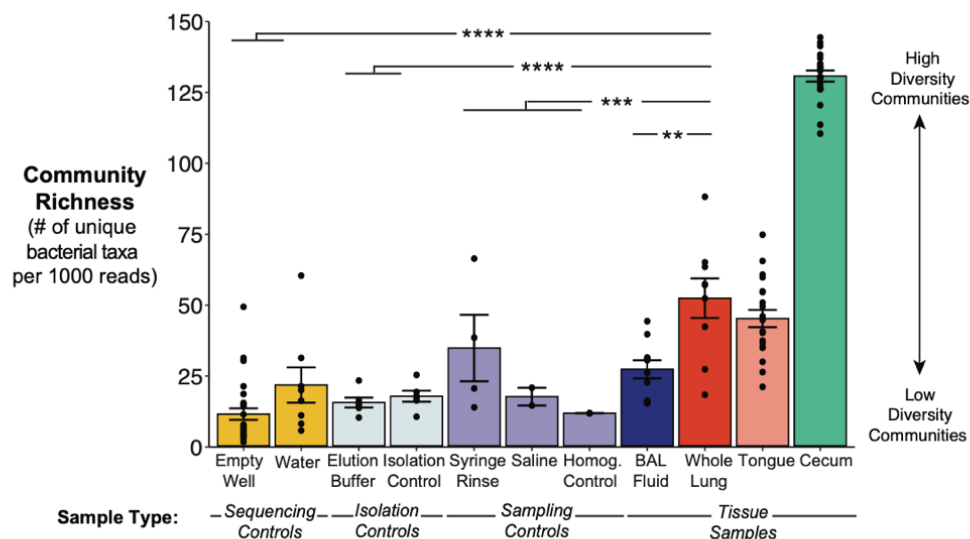

538

539 **Figure 3: Bacterial communities in murine whole lung tissue have increased alpha**

540 **diversity relative to BAL fluid and negative controls.** A. Whole lung tissue contains a greater

541 number of unique bacterial taxa than BAL fluid and negative controls. Richness of the bacterial

542 community in each tissue or control specimen was determined by clustering reads with species-

543 level similarity ( $\geq 97\%$  sequence identity) into operational taxonomic units (OTUs) and

544 calculating the number of unique OTUs within each specimen, normalized to 1000 reads per

545 specimen. Mean  $\pm$  SEM and individual data points are shown. Pairwise significance was

546 determined by comparing whole lung tissue and BAL fluid to pooled sampling, isolation, and

547 sequencing controls (respectively, as shown) using Tukey's HSD test. Significance key: ns  $p >$

548 0.05; \*  $p \leq 0.05$ ; \*\*  $p \leq 0.01$ ; \*\*\*  $p \leq 0.001$ ; \*\*\*\*  $p \leq 0.0001$ .

549

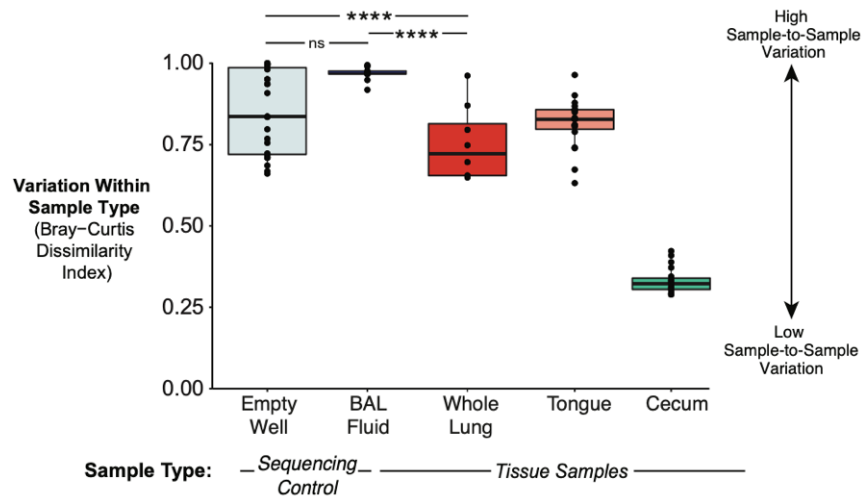

550

551 **Figure 4: Bacterial communities in murine whole lung tissue show decreased variation**  
552 **among biological replicates compared to those in BAL fluid.** Variation among lung bacterial  
553 communities of healthy mice from the same shipment was quantified using the Bray-Curtis  
554 dissimilarity index. For comparison, Bray-Curtis dissimilarity was also calculated for empty wells  
555 as a representative negative control with high variation, cecal communities as a representative  
556 body site with low variation, and tongue as a representative seed community for the lower  
557 respiratory tract. Median, IQR, and all unique pairwise comparisons (individual data points) are  
558 shown. Pairwise significance was determined by pairwise Wilcoxon test and corrected for  
559 multiple comparisons using the Benjamini-Hochberg method. Significance key: ns  $p > 0.05$ ; \*  $p$   
560  $\leq 0.05$ ; \*\*  $p \leq 0.01$ ; \*\*\*  $p \leq 0.001$ ; \*\*\*\*  $p \leq 0.0001$ .

561

562

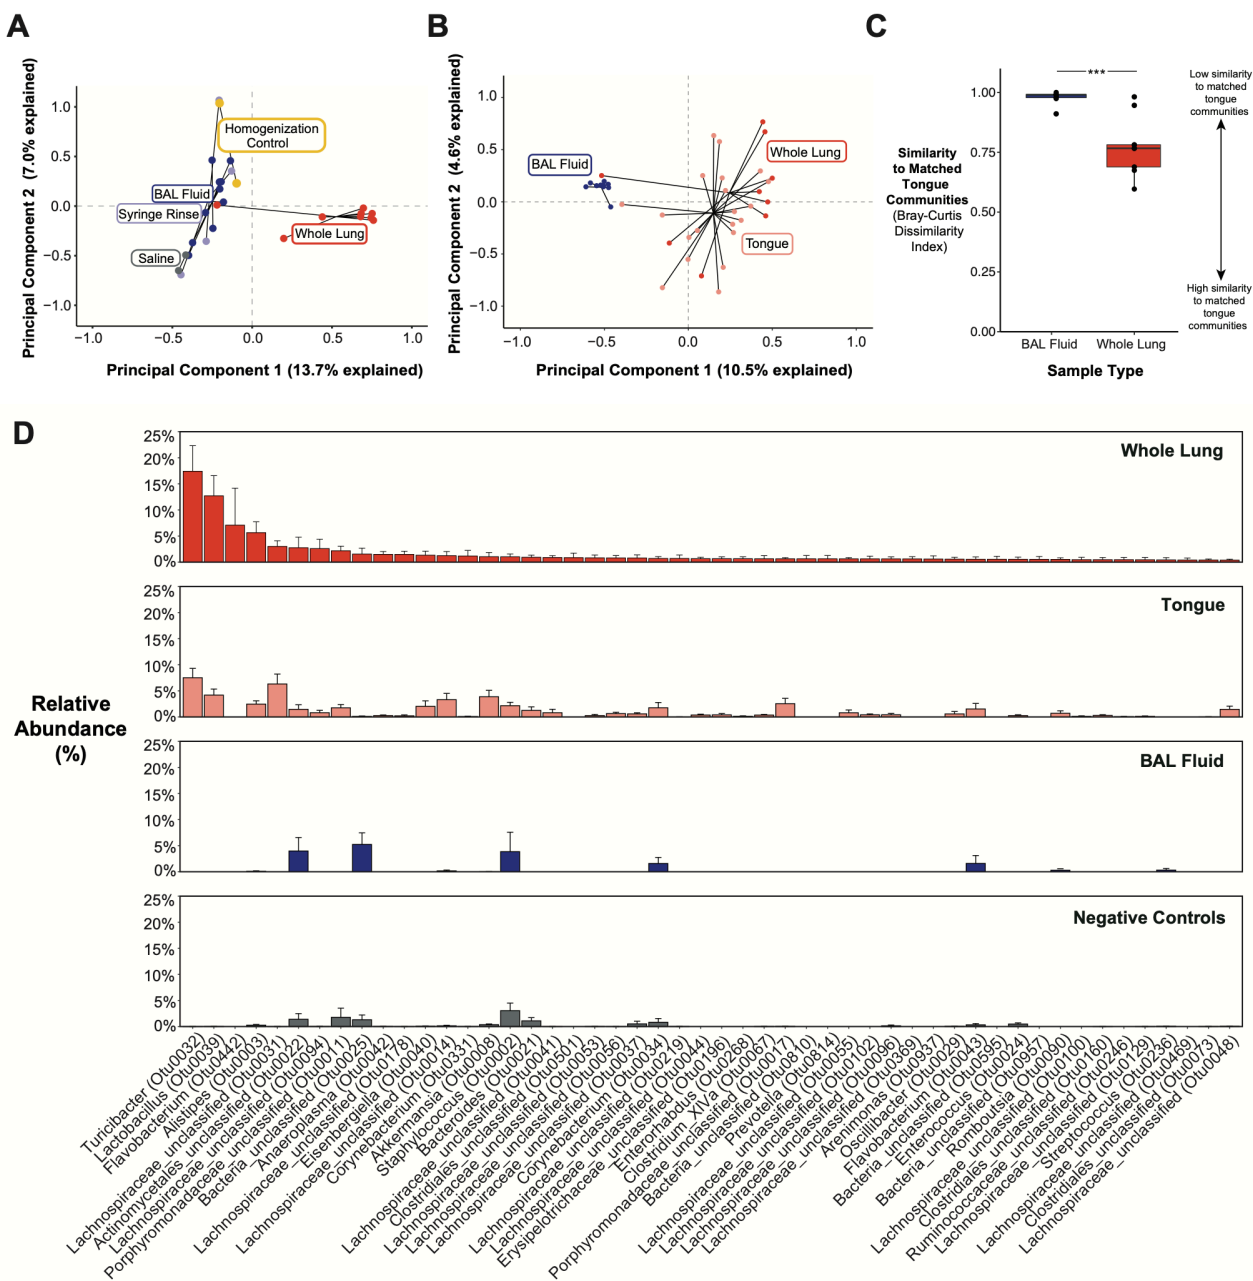

563

564

565 **Figure 5: The taxonomic composition of bacterial communities in murine whole lung**  
 566 **tissue is distinct from the background-dominant taxonomic composition of BAL fluid and**  
 567 **similar to that of the oral microbiome, a biologically plausible source community. A.**  
 568 **Whole lung tissue clusters separately from BAL fluid and sampling controls by principal**

569 component analysis of Hellinger-transformed 16S rRNA gene sequencing data. Individual data  
570 points represent specimens grouped by sample or control type. B. Whole lung tissue, but not  
571 BAL fluid, clusters near tongue samples by principal component analysis of Hellinger-  
572 transformed 16S rRNA gene sequencing data. Individual data points represent specimens  
573 grouped by sample type. C. Bacterial communities in whole lung tissue are more similar to  
574 matched (within-mouse) oral communities than BAL fluid. Similarity of lung bacterial  
575 communities, grouped by sampling approach, to matched oral communities was quantified  
576 using Bray-Curtis dissimilarity index. Median, IQR, and individual data points representing  
577 within-mouse comparisons of oral and lung communities are shown. D. Relative abundance of  
578 bacterial taxa in whole lung tissue are similar to that of oral bacterial communities. In contrast,  
579 the relative abundance of bacterial taxa in BAL fluid are similar to that of negative controls. Bars  
580 are ranked by mean abundance in whole lung tissue and represent mean  $\pm$  SEM percent  
581 relative abundance of the top 50 bacterial taxa (OTUs) in whole lung tissue across sample  
582 types. Labels denote genus (or most specific taxonomic level if no genus was assigned) and  
583 unique identifier for each OTU. Overall significance was determined by (A, B) permutational  
584 multivariate ANOVA ( $p = 0.00009$  for both). Pairwise significance was determined by (A, B) two-  
585 sample PERMANOVA (A only: pooled sampling controls were compared to each lung sample  
586 type), and (C) two-sample unpaired Mann-Whitney U test. Significance key: ns  $p > 0.05$ ; \*  $p \leq$   
587  $0.05$ ; \*\*  $p \leq 0.01$ ; \*\*\*  $p \leq 0.001$ ; \*\*\*\*  $p \leq 0.0001$ .

588

589 **Table 1: Comparison of Sampling Methods for Murine Lung Microbiome Studies.**

|                                                                      | <b>Whole Lung Tissue</b>                                                 | <b>Bronchoalveolar Lavage Fluid</b>                                                               |
|----------------------------------------------------------------------|--------------------------------------------------------------------------|---------------------------------------------------------------------------------------------------|
| Sample description                                                   | All lung lobes homogenized in sterile water                              | Dislodged airway and alveolar contents (microbes, leukocytes, epithelial cells) in sterile saline |
| Biological site sampled                                              | Airway and intra-alveolar space, interstitium, & blood (if not perfused) | Airway and intra-alveolar space only                                                              |
| Bacterial biomass                                                    | Low                                                                      | Low                                                                                               |
| Host-to-microbe DNA ratio                                            | High                                                                     | Low                                                                                               |
| Total DNA content                                                    | High                                                                     | Low                                                                                               |
| Number of 16S rRNA gene copies                                       | ~ 10 <sup>4</sup>                                                        | ~ 10 <sup>3</sup>                                                                                 |
| Variation among biological replicates                                | Low                                                                      | High                                                                                              |
| Similarity to contaminating source “communities” (negative controls) | Low                                                                      | High                                                                                              |
| Similarity to biological source community (oral microbiome)          | High                                                                     | Low                                                                                               |
